# Supplementary material for: Bioassay-Guided Isolation of Anthelmintic Components from Semen pharbitidis, and the Mechanism of Action of Pharbitin
Source: MDPI journal article supplement (doi:10.3390/ijms232415739), 2022-12-12
Supplement: s1 [file s1]

The Supplementary Materials for

**Bioassay-guided isolation of anthelmintic components from *Semen Pharbitidis*, and the mechanism of action of pharbitin**

Maoxuan Liu, Jing-Guang Lu, Ming-Rong Yang, Zhi-Hong Jiang, Xiaochun Wan and  
Walter Luyten

<sup>1</sup>H

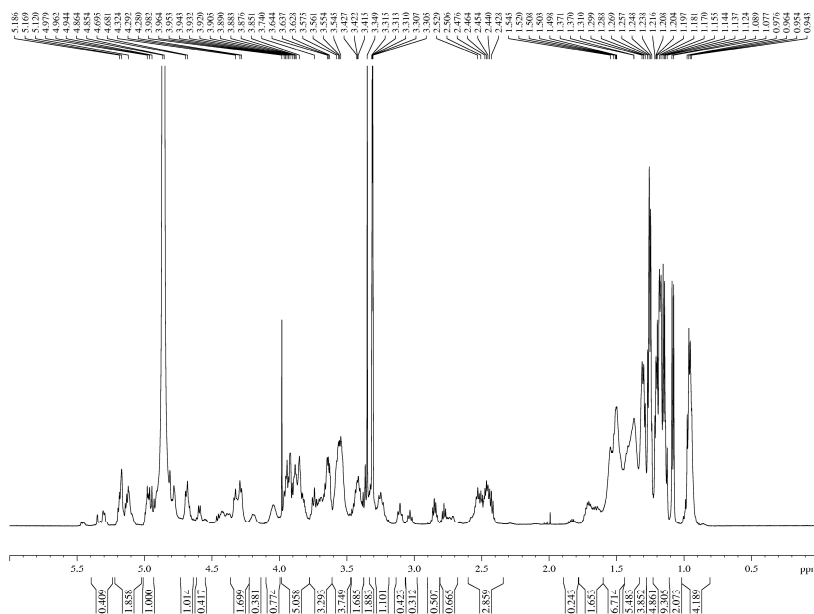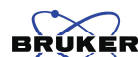

Current Data Parameters  
NAME: 80-27  
EXPNO: 2  
PROCNO: 1  
P2 - Acquisition Parameters  
Date\_ : 01/18/15  
Time: 15.15  
INSTRUM: spect  
PROBHD: 5 mm PABBO 500  
PULPROG: zgpg30  
TD: 65536  
SOLVENT: H2O  
NUC1: 13C  
QNP1: 101318.624 Hz  
FIDRES: 0.188325 Hz  
AQ: 2.6363926 sec  
RG: 101  
DM: 40.533 usec  
DE: 6.30 usec  
TE: 297.2 K  
D1: 1.00000000 sec  
D20: 20  
===== CHANNEL f1 =====  
NUC2: 13C  
P2: 101.324 usec  
PLW1: 28.00000000 W  
P2 Processing parameters  
SI: 65536  
SF: 600.130141 MHz  
WDW: Hanning  
SSB: 0  
LB: 0 Hz  
GB: 0  
PC: 1.00

<sup>1</sup>H

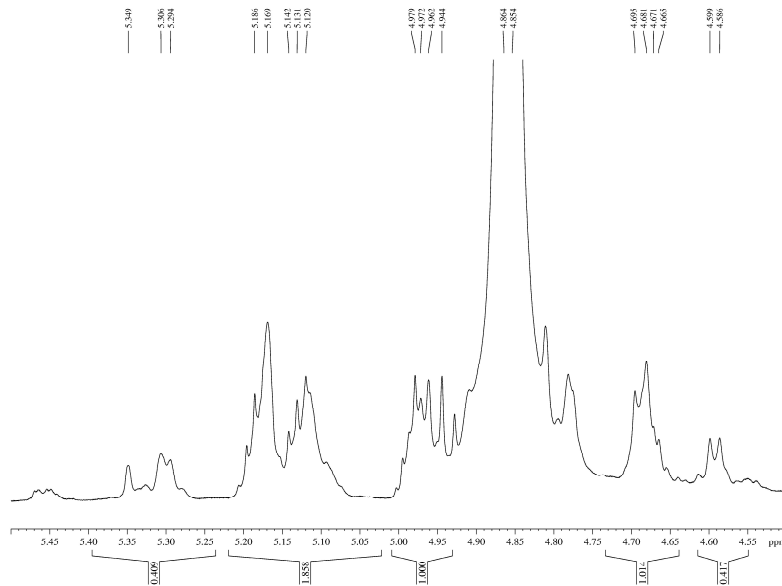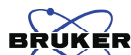

Current Data Parameters  
NAME: 80-27  
EXPNO: 2  
PROCNO: 1  
P2 - Acquisition Parameters  
Date\_ : 01/18/15  
Time: 15.15  
INSTRUM: spect  
PROBHD: 5 mm PABBO 500  
PULPROG: zgpg30  
TD: 65536  
SOLVENT: H2O  
NUC1: 13C  
QNP1: 101318.624 Hz  
FIDRES: 0.188325 Hz  
AQ: 2.6363926 sec  
RG: 101  
DM: 40.533 usec  
DE: 6.30 usec  
TE: 297.2 K  
D1: 1.00000000 sec  
D20: 20  
===== CHANNEL f1 =====  
NUC2: 13C  
P2: 101.324 usec  
PLW1: 28.00000000 W  
P2 Processing parameters  
SI: 65536  
SF: 600.130141 MHz  
WDW: Hanning  
SSB: 0  
LB: 0 Hz  
GB: 0  
PC: 1.00

<sup>1</sup>H

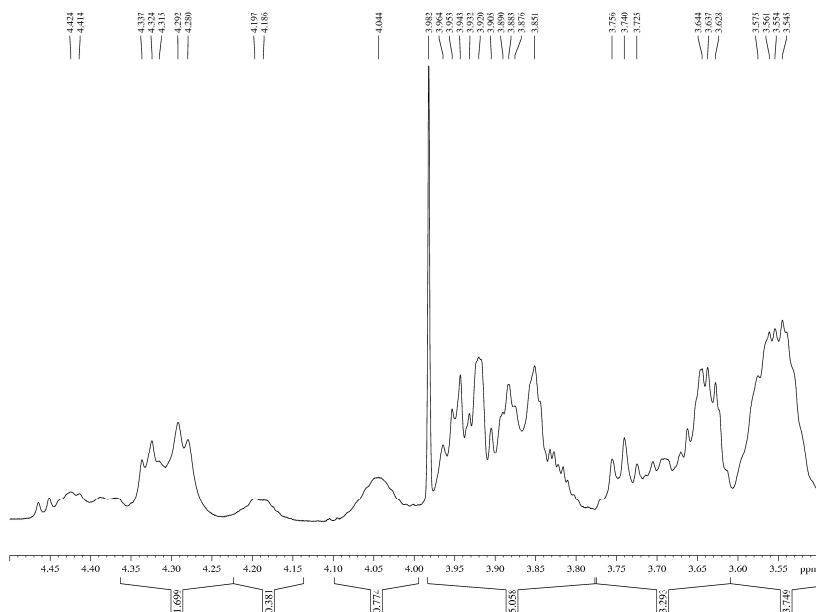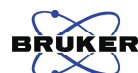

Current Data Parameters  
NAME: WC-27  
PROCNO: 1  
P2 - Acquisition Parameters  
DATE\_: 20110113  
Time: 15.19  
INSTRUM: spect  
PROBHD: 5 mm PABBO BB7  
PULPROG: zgpg30  
TD: 65536  
SOLVENT: H<sub>2</sub>O  
DS: 320  
SWH: 10338.424 Hz  
FIDRES: 0.1888220 Hz  
AQ: 2.6569720 sec  
RG: 170  
WDW: EM  
SSB: 40.573 usec  
GB: 4.50 usec  
TE: 297.2 K  
DE: 1.00000000 sec  
DT: 20  
===== CHANNEL f1 =====  
NUC1: 600.137041 MHz  
P1: 11.00 usec  
PL1: 28.00000000 W  
P2 Processing parameters  
SI: 65536  
SF: 600.130141 MHz  
WDW: EM  
SSB: 0  
GB: 0 Hz  
TE: 297.2 K  
DE: 1.00

<sup>1</sup>H

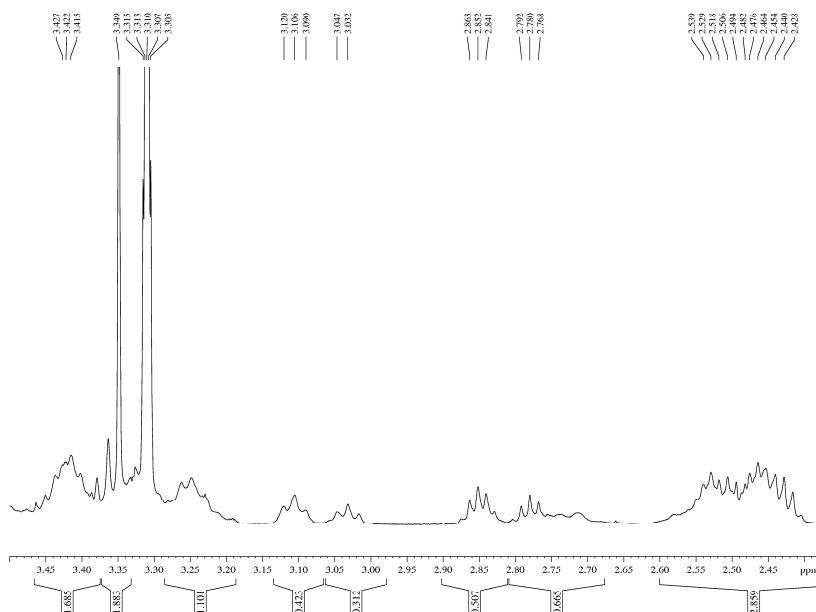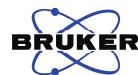

Current Data Parameters  
NAME: WC-27  
PROCNO: 1  
P2 - Acquisition Parameters  
DATE\_: 20110113  
Time: 15.19  
INSTRUM: spect  
PROBHD: 5 mm PABBO BB7  
PULPROG: zgpg30  
TD: 65536  
SOLVENT: H<sub>2</sub>O  
DS: 320  
SWH: 10338.424 Hz  
FIDRES: 0.1888220 Hz  
AQ: 2.6569720 sec  
RG: 170  
WDW: EM  
SSB: 40.573 usec  
GB: 4.50 usec  
TE: 297.2 K  
DE: 1.00000000 sec  
DT: 20  
===== CHANNEL f1 =====  
NUC1: 600.137041 MHz  
P1: 11.00 usec  
PL1: 28.00000000 W  
P2 Processing parameters  
SI: 65536  
SF: 600.130141 MHz  
WDW: EM  
SSB: 0  
GB: 0 Hz  
TE: 297.2 K  
DE: 1.00



```

Current Data Parameters
NAME          MW=2.7
SYNOPSIS      1
PROGRAM       1

F2 - Acquisition Parameters
Date_         20170411
Time_         15.10
INSTRUM       spect
PULPROG       zpgzpg
F0            400.1300141 MHz
TD            65536
CONVENTION    1
NS            320
DS            1
SS            1
AQ            19356.624 Hz
FIDRES        0.188225 Hz
AQ           2.6563926 sec
SI            160
DE            40.533 usec
DK            6.30 usec
TL            297.6 Hz
D1            1.00000000 sec
TD0           20

===== CHANNEL 1 Parameters =====
SPOL          600.1300141 MHz
NUC1          13C
P1            1.00 usec
PL1           28.00000000 dB
PLN1          28.00000000 dB

F2 Processing Parameters
SI            65536
SF            600.1300141 MHz
AQ            19.356624 sec
SSB           0
LB            0 Hz
GB            0
PC            1.00

```

17.784  
17.6110  
17.5900  
17.5744  
173.900  
102.995  
81.009  
78.540  
78.544  
78.544  
78.199  
78.199  
77.683  
77.683  
77.340  
77.340  
77.361  
77.361  
77.525  
77.525  
77.197  
77.197  
71.114  
70.277  
69.846  
69.846  
69.453  
69.453  
69.298  
69.298  
69.543  
69.543  
69.613  
69.613  
49.293  
49.293  
48.556  
48.556  
48.464  
48.464  
48.999  
48.999  
48.922  
48.922  
48.799  
48.799  
48.744  
48.744  
48.310  
48.310  
38.253  
38.253  
35.631  
35.631  
31.248  
31.248  
31.084  
31.084  
27.689  
27.689  
26.969  
26.969  
26.717  
26.717  
25.593  
25.593  
19.999  
19.999  
19.743  
19.743  
18.494  
18.494  
18.231  
18.231  
17.468  
17.468  
17.182  
17.182  
16.951  
16.951  
14.999  
14.999  
13.324  
13.324  
12.855  
12.855  
12.586  
12.586  
12.168  
12.168  
12.022  
12.022



```

Current Data Parameters
NAME                               MU-27
XPOS                               1
YPOS                               1
PROCNO                             1

F2 - Acquisition Parameters
NAME                               VALUE
TIME                               17.004
LTIME                              1.000
PROBHD 5 mm CPDHC1 13C          288.6
PULPROG                            zgpg30
DS                                  2
SOLVENT                             DMS
NS                                  2386
DS2                                 3602.61 Hz
FIDRES                             0.550197 Hz
AQ                                  0.900189 s
RG                                  128
DM                                  1
QM                                  0
TE                                  28.00
D1                                  2.000000000 s
d11                                  0.000000000 s
DELTA                               3
===== CHANNEL f1 =====
NUC1                               15N
P1                                  1.00
PL1                                 0.000000000 W
===== CHANNEL f2 =====
NUC2                               13C
P2                                  1.00
PL2                                 0.000000000 W
===== CHANNEL f3 =====
P3                                  1.00
PL3                                 0.000000000 W

F2 - Processing parameters
NAME                               VALUE
SI                                  32768
SF                                  150.902602 MHz
WDW                                  EM
SSB                                  0
GB                                  0
PC                                  0
=====

```



13C

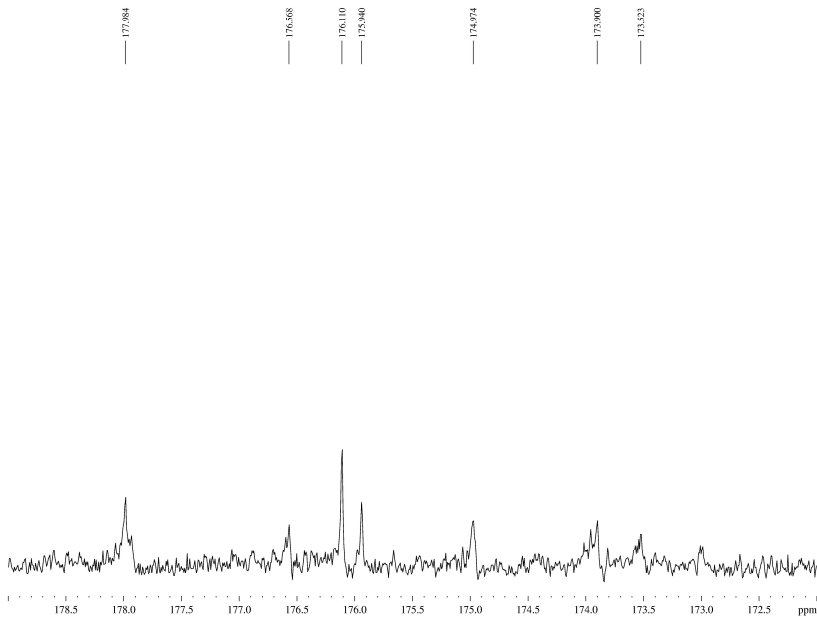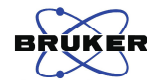

Current Data Parameters  
NAME WL-27  
EXNO 3  
PROCNO 1

F2 - Acquisition Parameters  
Date\_ 20170623  
Time 17.04  
INSTRUM spect  
PROBHD 5 mm CPDCH 13C  
PULPROG zgpg30  
TD 65536  
SOLVENT MeOH  
NS 2386  
DS 4  
SWH 36027.691 Hz  
FIDRES 0.550197 Hz  
AQ 0.9087659 sec  
RG 128  
DW 13.867 usec  
DE 20.00 usec  
TE 298.0 K  
D1 2.00000000 sec  
d11 0.03000000 sec  
TDO 3

----- CHANNEL f1 -----  
SFO1 150.9178993 MHz  
NUC1 13C  
P1 13.00 usec  
PLW1 25.00000000 W

----- CHANNEL f2 -----  
SFO2 600.1324005 MHz  
NUC2 1H  
CPDPRG2 waltz16  
PCPD2 70.00 usec  
PLW2 25.11899948 W  
PLW12 0.47441000 W  
PLW13 0.23246001 W

F2 - Processing parameters  
SI 32768  
SF 150.9026026 MHz  
WDW RM  
SSB 0  
LB 1.00 Hz  
GB 0  
PC 1.40

13C

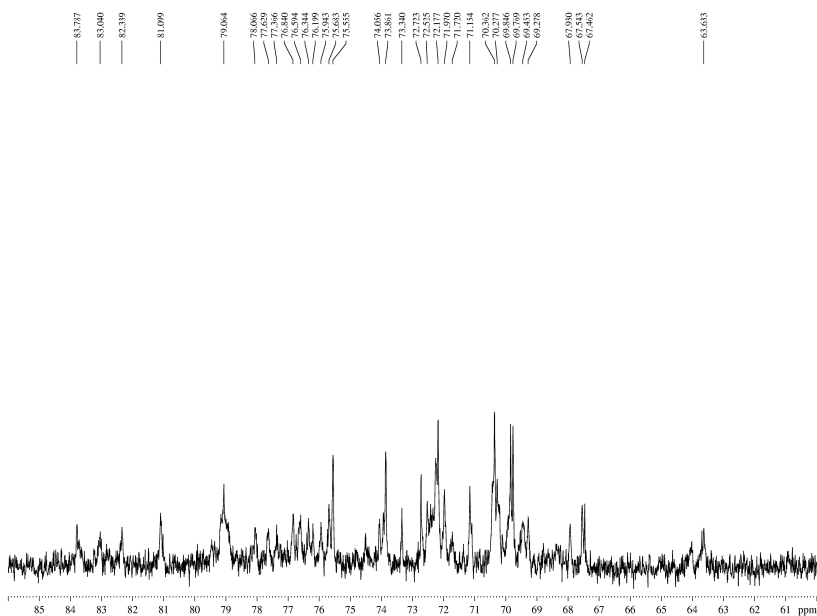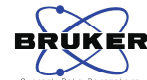

Current Data Parameters  
NAME WL-27  
EXNO 3  
PROCNO 1

F2 - Acquisition Parameters  
Date\_ 20170623  
Time 17.04  
INSTRUM spect  
PROBHD 5 mm CPDCH 13C  
PULPROG zgpg30  
TD 65536  
SOLVENT MeOH  
NS 2386  
DS 4  
SWH 36027.691 Hz  
FIDRES 0.550197 Hz  
AQ 0.9087659 sec  
RG 128  
DW 13.867 usec  
DE 20.00 usec  
TE 298.0 K  
D1 2.00000000 sec  
d11 0.03000000 sec  
TDO 3

----- CHANNEL f1 -----  
SFO1 150.9178993 MHz  
NUC1 13C  
P1 13.00 usec  
PLW1 25.00000000 W

----- CHANNEL f2 -----  
SFO2 600.1324005 MHz  
NUC2 1H  
CPDPRG2 waltz16  
PCPD2 70.00 usec  
PLW2 25.11899948 W  
PLW12 0.47441000 W  
PLW13 0.23246001 W

F2 - Processing parameters  
SI 32768  
SF 150.9026026 MHz  
WDW RM  
SSB 0  
LB 1.00 Hz  
GB 0  
PC 1.40

<sup>13</sup>C

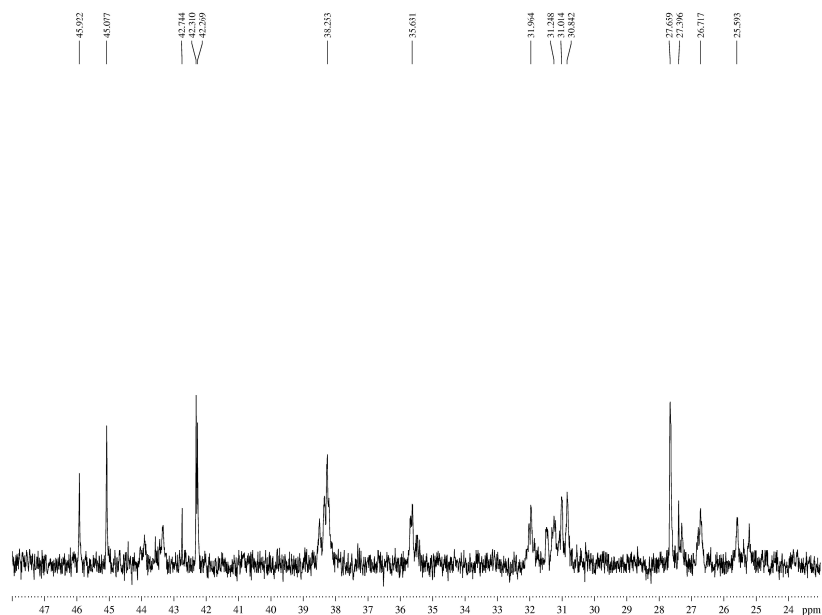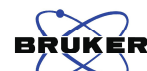

Current Data Parameters  
NAME WL-27  
EXNO 3  
PROCNO 1

F2 - Acquisition Parameters  
Date\_ 20170623  
Time 17.04  
INSTRUM spect  
PROBHD 5 mm CPDCH 13C  
PULPROG zgpg30  
TD 65536  
SOLVENT MeOH  
NS 2386  
DS 4  
SWH 36027.691 Hz  
FIDRES 0.550197 Hz  
AQ 0.9087659 sec  
RG 128  
DW 13.867 usec  
DE 20.00 usec  
TE 298.0 K  
D1 2.00000000 sec  
d11 0.03000000 sec  
TDO 3

===== CHANNEL f1 =====  
SFO1 150.9178993 MHz  
NUC1 13C  
P1 13.00 usec  
PLW1 25.00000000 W

===== CHANNEL f2 =====  
SFO2 600.1324005 MHz  
NUC2 1H  
CPDPRG2 waltz16  
PCPD 70.00 usec  
PLW2 25.11899948 W  
PLW12 0.47441000 W  
PLW13 0.23246001 W

F2 - Processing parameters  
SI 32768  
SF 150.9026026 MHz  
WDW RM  
SSB 0  
LB 1.00 Hz  
GB 0  
PC 1.40

<sup>13</sup>C

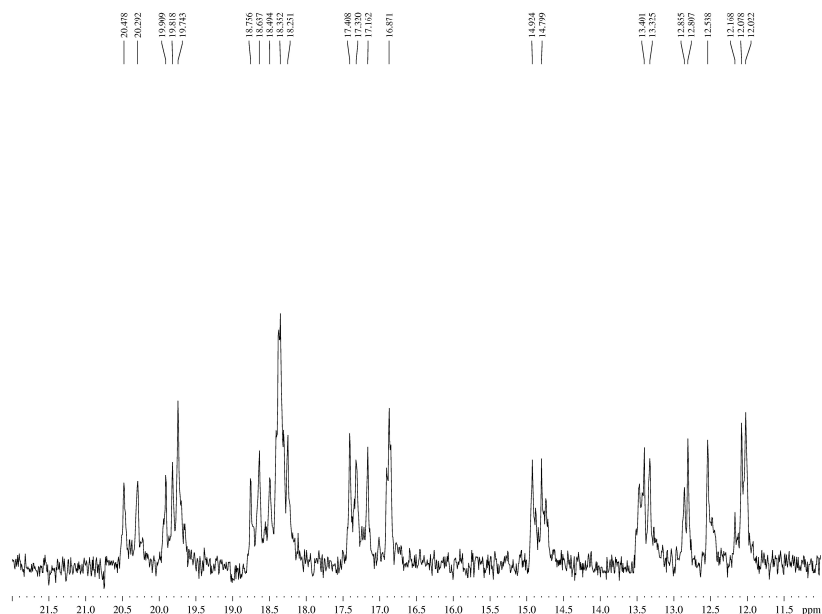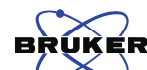

Current Data Parameters  
NAME WL-27  
EXNO 3  
PROCNO 1

F2 - Acquisition Parameters  
Date\_ 20170623  
Time 17.04  
INSTRUM spect  
PROBHD 5 mm CPDCH 13C  
PULPROG zgpg30  
TD 65536  
SOLVENT MeOH  
NS 2386  
DS 4  
SWH 36027.691 Hz  
FIDRES 0.550197 Hz  
AQ 0.9087659 sec  
RG 128  
DW 13.867 usec  
DE 20.00 usec  
TE 298.0 K  
D1 2.00000000 sec  
d11 0.03000000 sec  
TDO 3

===== CHANNEL f1 =====  
SFO1 150.9178993 MHz  
NUC1 13C  
P1 13.00 usec  
PLW1 25.00000000 W

===== CHANNEL f2 =====  
SFO2 600.1324005 MHz  
NUC2 1H  
CPDPRG2 waltz16  
PCPD 70.00 usec  
PLW2 25.11899948 W  
PLW12 0.47441000 W  
PLW13 0.23246001 W

F2 - Processing parameters  
SI 32768  
SF 150.9026026 MHz  
WDW RM  
SSB 0  
LB 1.00 Hz  
GB 0  
PC 1.40

Figure. S2. <sup>13</sup>C-NMR spectrum of the active peak

**11-(D-glucopyranosyloxy)-3-hydroxy-tetradecanoic acid** (C<sub>20</sub>H<sub>38</sub>O<sub>9</sub>, exact mass: 422.2516)

HRMS-ESI: [M+H]<sup>+</sup> calcd. 423.2589, found 423.2588. [M+Na]<sup>+</sup> calcd. 445.2408, found 445.2403. [M-H]<sup>-</sup> calcd. 421.2443, found 421.2448.

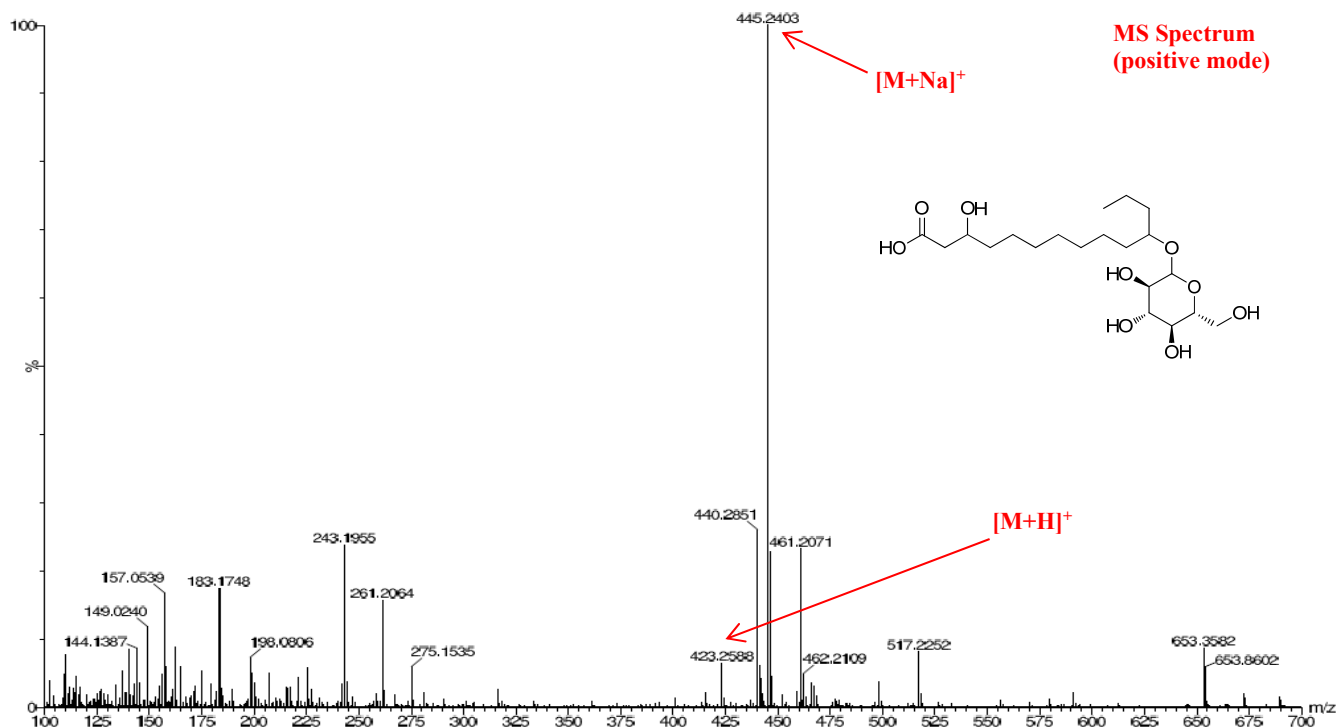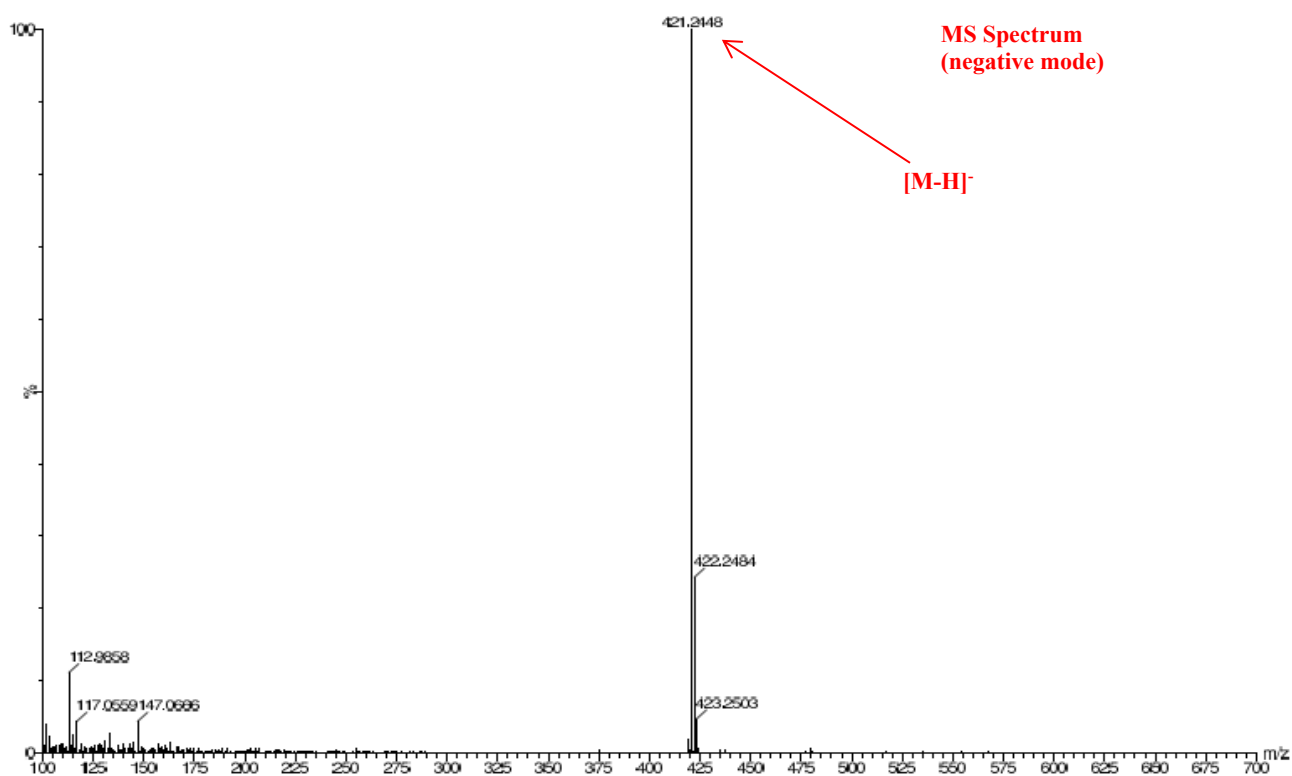

Figure. S3. HRMS spectra of 11-(D-glucopyranosyloxy)-3-hydroxy-tetradecanoic acid

**Ipurolic acid** (C<sub>14</sub>H<sub>28</sub>O<sub>4</sub>, exact mass: 260.1988)

HRMS-ESI: [M+Na]<sup>+</sup> calcd. 283.1880, found 283.1877. [M-H]<sup>-</sup> calcd. 259.1915, found 259.1923.

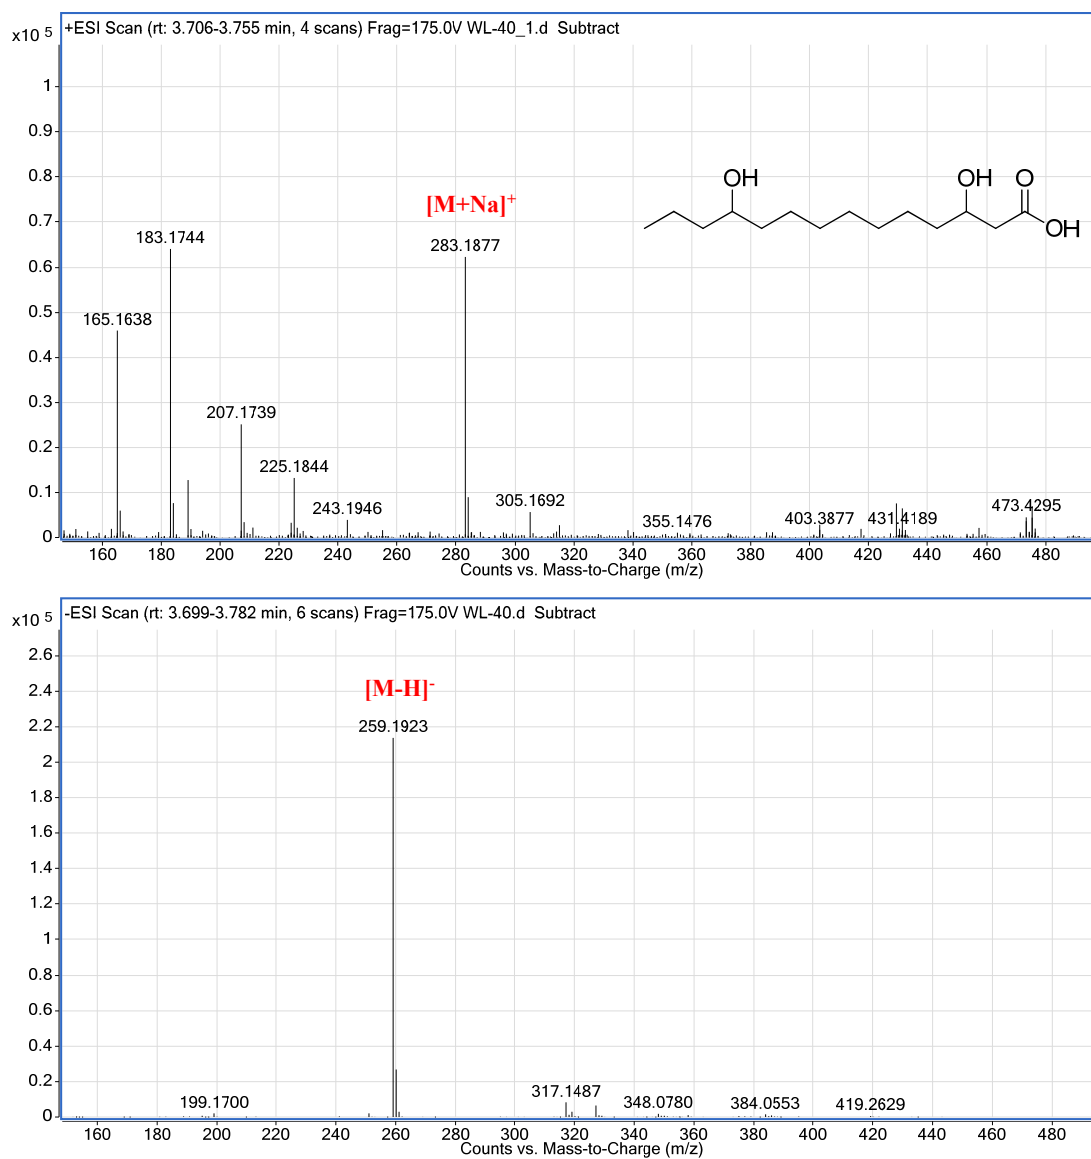

Figure. S4. HRMS spectra of ipurolic acid

Table S1. HRMS results of pharbitin

| compound | formula                                          | exact mass | calcd. [M-H] <sup>-</sup> | [M-H] <sup>-</sup> | calcd. [M+Na] <sup>+</sup> | [M+Na] <sup>+</sup> |
|----------|--------------------------------------------------|------------|---------------------------|--------------------|----------------------------|---------------------|
| 1        | C <sub>65</sub> H <sub>112</sub> O <sub>35</sub> | 1452.6984  | 1451.6911                 | 1451.6936          | 1475.6876                  | 1475.6933           |
| 2        | C <sub>65</sub> H <sub>112</sub> O <sub>35</sub> | 1452.6984  | 1451.6911                 | 1451.6936          | 1475.6876                  | 1475.6933           |
| 3        | C <sub>59</sub> H <sub>102</sub> O <sub>31</sub> | 1306.6405  | 1305.6332                 | 1305.6425          | 1329.6297                  | 1329.6827           |
| 4        | C <sub>59</sub> H <sub>102</sub> O <sub>31</sub> | 1306.6405  | 1305.6332                 | 1305.6425          | 1329.6297                  | 1329.6827           |
| 5        | C <sub>70</sub> H <sub>120</sub> O <sub>37</sub> | 1552.7508  | 1551.7435                 | 1551.7531          | 1575.7400                  | 1575.7380           |
| 6        | C <sub>70</sub> H <sub>120</sub> O <sub>37</sub> | 1552.7508  | 1551.7435                 | 1551.7531          | 1575.7400                  | 1575.7380           |
| 7        | C <sub>71</sub> H <sub>122</sub> O <sub>37</sub> | 1566.7665  | 1565.7592                 | 1565.7568          | 1589.7557                  | 1589.7495           |
| 8        | C <sub>71</sub> H <sub>122</sub> O <sub>37</sub> | 1566.7665  | 1565.7592                 | 1565.7568          | 1589.7557                  | 1589.7495           |

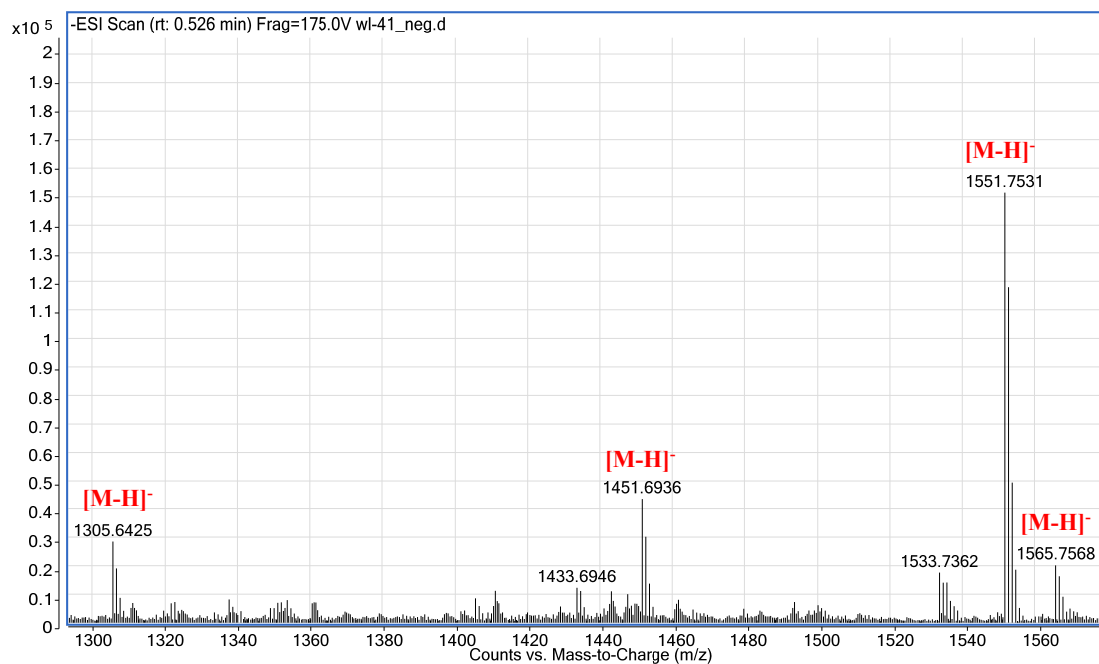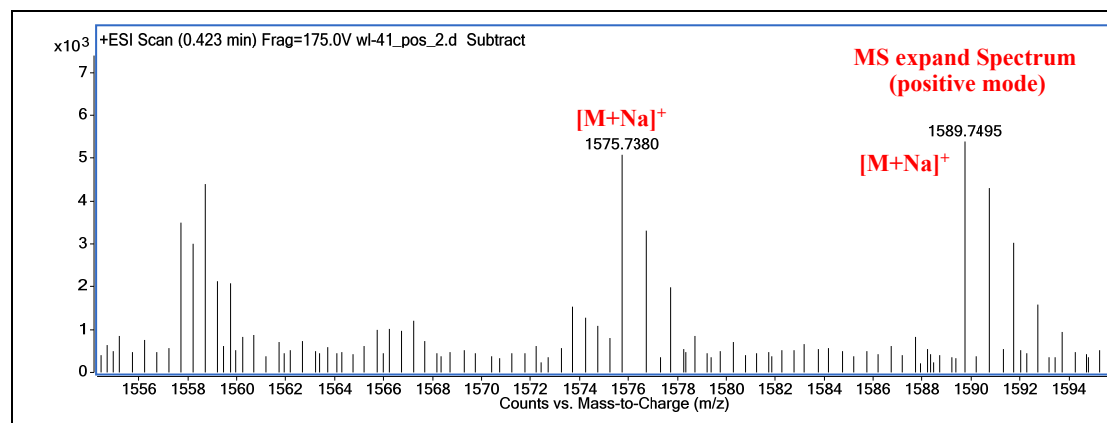

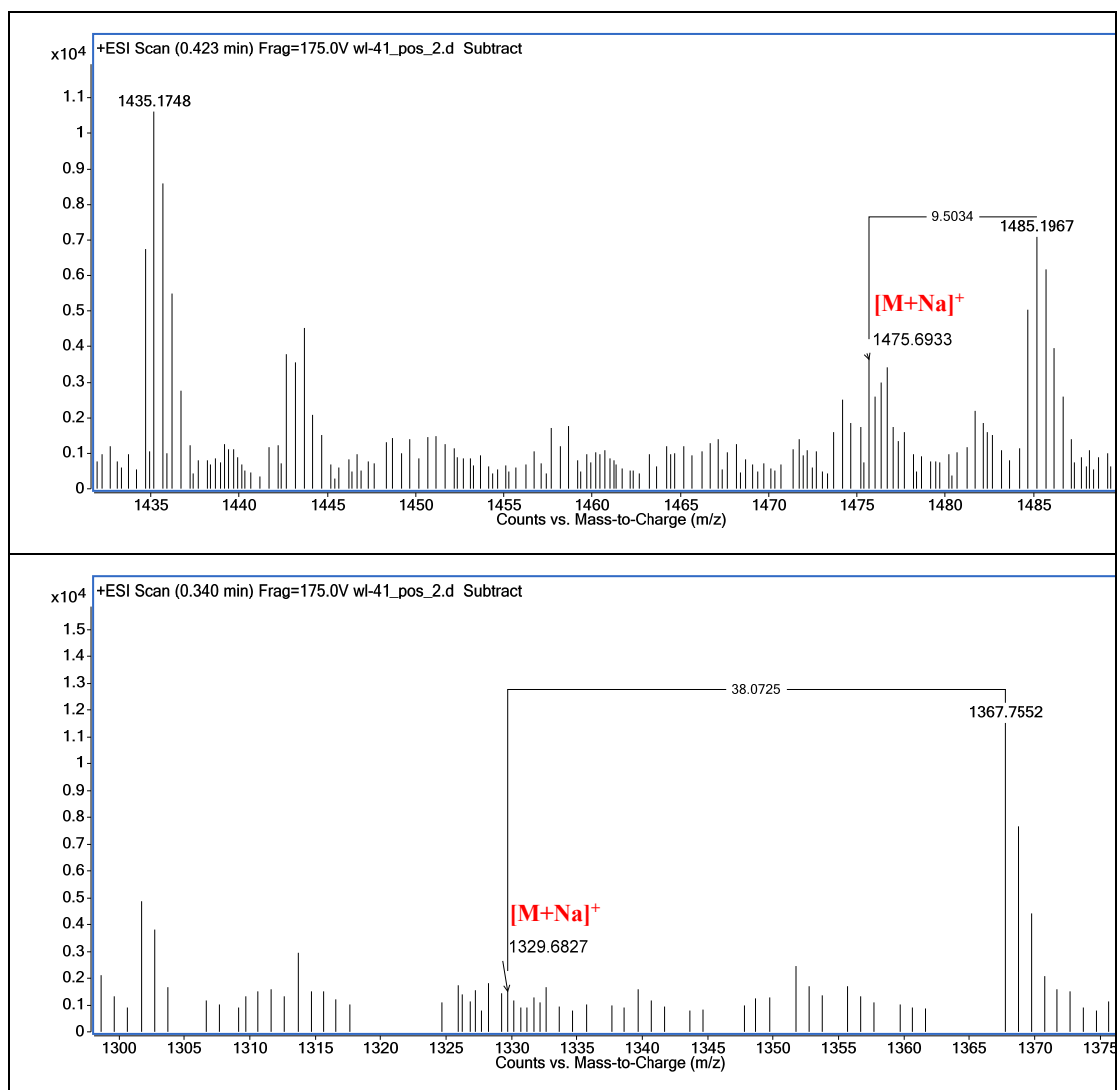

Figure. S5. HRMS spectra of the active peak (pharbitin)
